# Supplementary material for: 2D-supramolecular arrangements of dibenzo-18-crown-6-ether and its inclusion complex with potassium ion by potential controlled adsorption
Source: Royal Society of Chemistry journal article supplement (doi:10.1039/b208717k), 2002-12-09
Supplement: b208717k.doc [file b208717k.doc]

**Supplementary data**

**Materials and Methods**

***1. Materials***

All solutions were prepared with ultra-pure (Milli-Q, SP-TOC: > 18.2 M cm1). HClO4 (ultrapure grade, KANTO CHEMICAL Co. Ltd. Japan) was used as electrolyte solution without further purification. Dibenzo-18-crown-6 (DB18C6) was purchased from Nakarai Chemical Co. Ltd. Japan and used without further purification. The inclusion complex (DB18C6-KI) was synthesized by reflux in methanol and two times purified by recrystallization from water.

Au wire (0.8 mm in diameter) of which the purity is 99.999% was obtained from TANAKA KIKINZOKU Co. Ltd. Japan to prepare single crystal bead for electrochemical and STM measurements. Pt wire was (0.8 mm in diameter and the purity is 99.99%) also obtained from TANAKA KIKINZOKU for counter electrode and/or quasi-reference electrode.

***2. Sample preparation for DB18C6***

The L films of DB18C6 were arrested at 0.80 nm2/molecule on pure water with a chloroform solution, and were transferred onto the Au(111) surfaces on a facet by a single step *via* simple crossing of the air-water interface. Then, almost no surface pressure was observed. After the transfer, the sample was placed in an *in situ* STM cell filled with 0.1 M HClO4.

***3. Sample preparation for DB18C6-KI inclusion complex***

The sample solution for DB18C6-KI complex was prepared by adding approximately 50 L of saturated water solution of the complex into 2.5mL of 0.05 M HClO4 electrolyte solution. Then, the solution was filled into a STM cell.

***4. Electrochemical Scannning Tunneling Microscopy (EC-STM)***

*In-situ* STM measurements were carried out with a Nanoscope E (Digital Instruments, Santa Barbara, California). An Au(111) facet formed on a single crystal bead was used for STM measurements. The tunneling tip was prepared from an electrochemically etched W wire, and its side wall was sealed with transparent nail polish to reduce the faradaic current. Several nail polished tips were kept in the water more than one day to check the influence of impurities for STM experiments. All images were collected in the constant current mode. The Au(111) electrodes were annealed in a H2-O2 flame and quenched in pure water saturated with H2. Two Pt wires were used as reference and counter electrode in the STM cell, respectively. All potentials are quoted with respect to a saturated calomel electrode (SCE).
